# Supplementary material
Source: Springer Nature journal article supplement (https://www.springermedizin.de/resource/supplementary/12865_2009_280_MOESM2_ESM.pdf/9427668)

**A**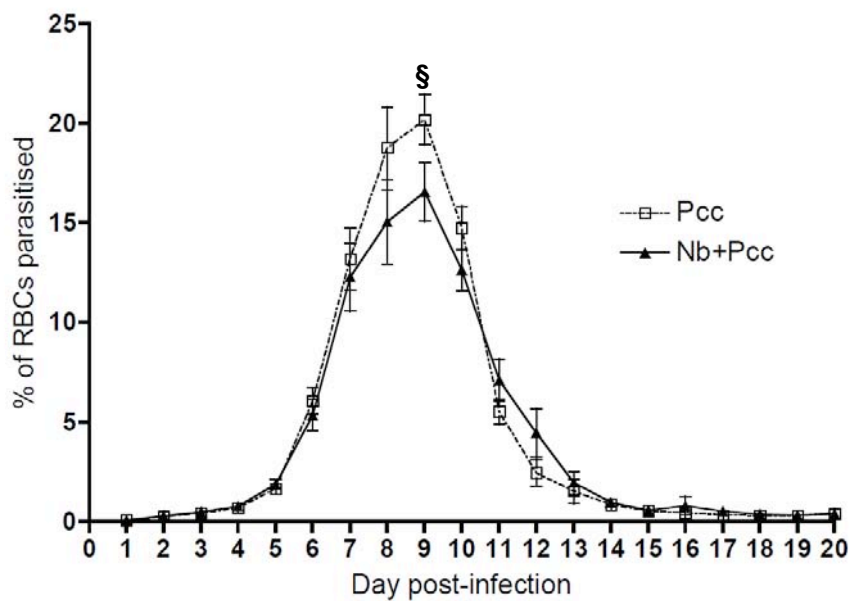**B**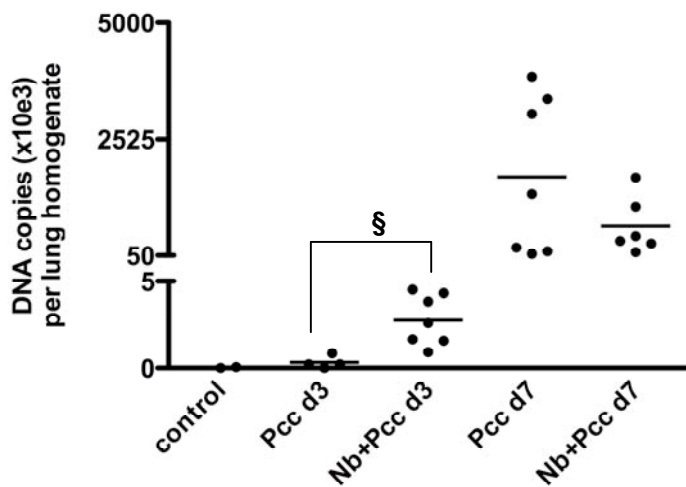

Supplement: MOESM2 [file 9427668]
